# Supplementary material for: Biallelic NDUFA4 Deletion Causes Mitochondrial Complex IV Deficiency in a Patient with Leigh Syndrome
Source: MDPI journal article supplement (doi:10.3390/genes15040500), 2024-04-17
Supplement: s1 [file s1]

## Supplemental material

### Biallelic *NDUF44* deletion causes Mitochondrial Complex IV deficiency in a patient with Leigh syndrome

#### Sanger sequencing of the PCR product obtained with primers flanking the deletion in the patient

```
ATCATCCCAC TTCTTAAGAC TTACAGCTCT GGTGTAAAAG CCAGTCACCT 50
TGTTTCATGTG TTGAAATCAA TGATATTTGC AATAAAAAGA TTATTTAATC 100
AGATTGTTAA CAGCTGAATA AGCTTTTACC AAATAGTCCT TTTCTTTCCA 150
AGTTTTATAT AATATGGCTT TTAGAATTTT CCCCGccagg catggtggct 200
cacgcctgta atcccagtac ttcaggaggt caaggcagga agatcacgac 250
gtgaagagac tgagaccatc ctggccaata tggtgaaaac tcgtctctac 300
caaaaataca aaaaattacc ccagtgtggt ggcattgcacc tgtagtccca 350
gctactcggg aggctgaggc aggagaattg cttgaaccgc ggagacagag 400
gttgcagtga gccgagttcg caccactgca ctccagcctg ggcaatatga 450
gcaaaaactct gtctcagaaa aaaaaaaaaa aattgcttga actcaggaga 500
tagaggttgc agtgagccaa gattgcacca ctgcactcca actgggtgac 550
agagtggagac tccatctctg aaacaaaaat aaaataaaaa TAACAAAGAA 600
AACCAGctgg gcatgttggc ataaccgtag tcccacctac ttgggaggct 650
aaagcgggag gattgtttta actcaggagt tgcaggctac aatgaactaa 700
gatcgcgccca ctgcactcca gcctgggtga cagagagaaa ctctgtccca 750
aaaTAAGTGA TGCCTTTAtt tattttat ttttttggag 800
atggagtctc gctctgtggc ccaacctgga gtgtggtggc acgatctcgg 850
ctcactgcaa cctctgcctc ccagggttcaa gcgattctcc tgcctcagcc 900
tccccaatag ctgggactac aggcacatgc caccacaccc ggttaatttt 950
ttgtatTTTT agtagagatg gggtttcacc gtgttagtca ggatggtctc 1000
gatctctgga cctcgtgatc tgcccacctc ggccctccca agtgctggga 1050
ttacagggtg gagccaccgc acctggccTA AGTGATGCCT TTAGAGATGT 1100
TAACAAAGCA AGGTTACAAA TATAAATTTC ATTAAATATT AACCAAATG 1150
TCAAATTGTG AAAGTTTAAA TTTTGCACAT TGAAGTTAGT GGA
```

Color legend.

**Black** DNA mapping at chr7:10969033-10969448 with 100% identity.

**Blue** DNA mapping at chr19:14427161-14427497, 337 bases, with 100% identity.

**Green** DNA mapping at chr7:10982429-10982868 with 100% identity.

The 337 bases have also 82.1% identity to chr7:101018817-101019244, spanning 428 bases

(<https://genome.ucsc.edu/>, BLAT Tool).

Small letters indicate repetitive elements.

**Alignment between chr19:14427161-14427497 and AluSc8 at chr7:10982444-10982753**

|              |            |            |
|--------------|------------|------------|
| Identities   | Gaps       | Strand     |
| 91/116 (78%) | 2/116 (1%) | Plus/Minus |

Chr19:14427223    aGAATTGCTTGAACCTCAGGAGATAGAGGTTGCAGTGAGCCAAAGATTGCACCACCTGCACCTC    Chr19:14427282  
| | | | | | | | | | | | | | | | | | | | | | | | | | | |  
Chr7:10982563    AGAATCGCTTGAACCTGGGAGGCAGAGGTTGCAGTGAGCCGAGATCGTGCCACCACACTC    Chr7:10982503

Chr19:14427283    CA-ACTGGGTGACAGAGTGAGACTCCATCTCTGaaacaaaataaaaaataaa    Chr19:14427337  
| | | | | | | | | | | | | | | | | | | | | | | | | | | |  
Chr7:10982503    CAGGTTGGGGCCACAGAGCGAGACTCCATCTC-AAAAAATAAACAAAACAAAAATAA    Chr7:10982449

**Alignment between chr19:14427161-14427497 and AluSc at chr7:10969217-10969522**

Range 1: 239 to 296

| Identities  | Gaps      | Strand    |
|-------------|-----------|-----------|
| 52/60 (87%) | 2/60 (3%) | Plus/Plus |

Chr19:14427167 CCACTGCACTCCAGCCTGGGCAATATGAGCAAACACTGTGTCTCAGaaaaaaaaaaaaaGAA Chr19:14427226  
| | | | | | | | | | | | | | | | | | | | | | | |  
Chr7:10969455 CCACTGCACTCCAGCCT-GGCAACA-GAGCAAGACTCCATCTCAAAAAAAAAAAAAAAAAA Chr7: 10969513

Range 2: 190 to 304

| Identities   | Gaps       | Strand    |
|--------------|------------|-----------|
| 95/115 (83%) | 0/115 (0%) | Plus/Plus |

|                |                                                                |                |
|----------------|----------------------------------------------------------------|----------------|
| Chr19:14427223 | aGAATTGCTTGAACCTCAGGAGATAGAGGTTGCAGTGAGCCAAAGATTGCACCACTGCACTC | Chr19:14427282 |
| Chr7:10969406  | AGAATTGCTTGAACCCGGGAGACAGAGGTTGCAGTGAGCCGAGATGGTGCCACTGCACTC   | Chr7:10969465  |
| Chr19:14427283 | CAACTGGGTGACAGAGTGAGACTCCATCTCTGaaaacaaaataaaaataaa            | Chr19:14427337 |
| Chr7:10969455  | CAGCGTGGCAACAGAGCAAGACTCCATCTCAAAAAAAAAAAAAAAAAAAAAA           | Chr7:10969513  |

Range 3: 143 to 283

|               |            |           |
|---------------|------------|-----------|
| Identities    | Gaps       | Strand    |
| 107/142 (75%) | 3/142 (2%) | Plus/Plus |

|                |                                                              |                |
|----------------|--------------------------------------------------------------|----------------|
| Chr19:14427358 | TGTTGGCATA-ACC-GTAGTCCCACCTACTTGGGAGGCTAAAGCGGGAGGATTGTTTAAA | Chr19:14427415 |
|                |                                                              |                |
| Chr7:10969359  | TGGTGGCATGCACCTGTAGTCCCAGCTACTCGGGAGGCTGAGGCAGGAGAATTGCTTGAA | Chr7:10969408  |
| Chr19:14427416 | CTCAGGAGTTGCAGGCTACAATGAACTAAGATCGCGCCACTGCACTCCAGCCTGGGTGAC | Chr19:14427475 |
|                |                                                              |                |
| Chr7: 10969409 | CCCCGGAGACAGAGGTTGCAGTGAGCCGAGATGGTGCCACTGCACTCCAGCCT-GGCAAC | Chr7:10969458  |
| Chr19:14427476 | AGAGAGAAACTCTGTCCCAAAA                                       | Chr19:14427497 |
|                |                                                              |                |
| Chr7: 10969459 | AGAGCAAGACTCCATCTCAAAA                                       | Chr7:10969499  |
